# Supplementary material for: Favorable impact of allogeneic stem cell transplantation in patients with therapy-related myelodysplasia regardless of TP53 mutational status
Source: PubMed Central journal article supplement — Haematologica. 2017 Sep 29;102(12):2030–8. doi: 10.3324/haematol.2017.172544 (PMC5709102; doi:10.3324/haematol.2017.172544), 2017-12

## Favorable impact of allogeneic stem cell transplantation in patients with therapy-related myelodysplasia regardless of *TP53* mutational status

Ibrahim Aldoss,<sup>1\*</sup> Anh Pham,<sup>1\*</sup> Sierra Min Li,<sup>2</sup> Ketevan Gendzekhadze,<sup>3</sup> Michelle Afkhami,<sup>4</sup> Milhan Telatar,<sup>4</sup> Hao Hong,<sup>4</sup> Abbas Padeganeh,<sup>5</sup> Victoria Bedell,<sup>5</sup> Thai Cao,<sup>1</sup> Samer K Khaled,<sup>1</sup> Monzr M Al Malki,<sup>1</sup> Amandeep Salhotra,<sup>1</sup> Haris Ali,<sup>1</sup> Ahmed Aribi,<sup>1</sup> Joycelynne Palmer,<sup>2</sup> Patricia Aoun,<sup>4</sup> Ricardo Spielberger,<sup>1</sup> Anthony S Stein,<sup>1</sup> David Snyder,<sup>1</sup> Margaret R O'Donnell,<sup>1</sup> Joyce Murata-Collins,<sup>5</sup> David Senitzer,<sup>3</sup> Dennis Weisenburger,<sup>4</sup> Stephen J Forman,<sup>1</sup> Vinod Pullarkat,<sup>1</sup> Guido Marcucci,<sup>1</sup> Raju Pillai<sup>4#</sup> and Ryotaro Nakamura<sup>1#</sup>

<sup>1</sup>Department of Hematology and Hematopoietic Cell Transplantation, Gehr Family Center for Leukemia Research, City of Hope; <sup>2</sup>Department of Information Sciences, Division of Biostatistics, City of Hope; <sup>3</sup>HLA Laboratory, City of Hope; <sup>4</sup>Department of Pathology, City of Hope, and <sup>5</sup>Department of Cytogenetics, City of Hope, Duarte, CA, USA

*\*IA and AP contributed equally to this manuscript as first authors*

*#RP and RN contributed equally to this manuscript as senior authors*

©2017 Ferrata Storti Foundation. This is an open-access paper. doi:10.3324/haematol.2017.172544

Received: June 9, 2017.

Accepted: September 20, 2017.

Pre-published: September 29, 2017.

Correspondence: rnakamura@coh.org

---

**Supplement Figure Legends:**

**Supplement Figure 1.** TP53 mutations plot.

**Supplement Figure 2.** (a) OS, and (b) RFS for t-MDS patients with TP53-wild (solid line), one TP53 mutation (dashed line), and more than 1 TP53 mutation (dotted line).

**Supplement Figure 3.** The frequency of additional CNV abnormalities and LOH regions identified by microarray compared to conventional analysis.

**Supplement table 1- List of sequenced genes**

|               |               |               |              |               |               |               |                |
|---------------|---------------|---------------|--------------|---------------|---------------|---------------|----------------|
| <i>ASXL1</i>  | <i>CBLB</i>   | <i>DNMT3A</i> | <i>IDH1</i>  | <i>KMT2A</i>  | <i>NOTCH1</i> | <i>PTPN11</i> | <i>TET2</i>    |
| <i>ATM</i>    | <i>CCND1</i>  | <i>EP300</i>  | <i>IDH2</i>  | <i>KMT2C</i>  | <i>NOTCH2</i> | <i>RUNX1</i>  | <i>TNFAIP3</i> |
| <i>BCOR</i>   | <i>CCND3</i>  | <i>ETV6</i>   | <i>IKZF1</i> | <i>KMT2D</i>  | <i>NPM1</i>   | <i>SETBP1</i> | <i>TP53</i>    |
| <i>BIRC3</i>  | <i>CD79A</i>  | <i>EZH2</i>   | <i>IL7R</i>  | <i>KRAS</i>   | <i>NRAS</i>   | <i>SF3B1</i>  | <i>U2AF1</i>   |
| <i>BRAF</i>   | <i>CD79B</i>  | <i>FBXW7</i>  | <i>JAK1</i>  | <i>MEF2B</i>  | <i>PAX5</i>   | <i>SPI1</i>   | <i>UBR5</i>    |
| <i>BTK</i>    | <i>CDKN2A</i> | <i>GATA1</i>  | <i>JAK2</i>  | <i>MIR142</i> | <i>PDGFRA</i> | <i>SRSF2</i>  | <i>WHSC1</i>   |
| <i>CALR</i>   | <i>CEBPA</i>  | <i>GATA2</i>  | <i>JAK3</i>  | <i>MPL</i>    | <i>PHF6</i>   | <i>STAG2</i>  | <i>WHSC1L1</i> |
| <i>CARD11</i> | <i>CREBBP</i> | <i>HRAS</i>   | <i>KDM6A</i> | <i>MYC</i>    | <i>PIK3CA</i> | <i>SUZ12</i>  | <i>WT1</i>     |
| <i>CBL</i>    | <i>CSF3R</i>  | <i>ID3</i>    | <i>KIT</i>   | <i>MYD88</i>  | <i>PTEN</i>   | <i>TCF3</i>   | <i>ZRSR2</i>   |

Supplement table 2- List of variants with VAF and coverage

| SampleID | Chr | Gene   | Coding change                                                                 | Amino acid change  | Coverage | Frequency |
|----------|-----|--------|-------------------------------------------------------------------------------|--------------------|----------|-----------|
| 2101     | 17  | TP53   | c.818G>A                                                                      | p.Arg273His        | 1727     | 38.6      |
| 2229     | 18  | SETBP1 | c.244G>T                                                                      | p.Ala82Ser         | 872      | 45.6      |
| 2229     | 18  | SETBP1 | c.2608G>C                                                                     | p.Gly870Arg        | 631      | 39.9      |
| 2229     | 4   | TET2   | c.1397delT                                                                    | p.Leu467fs         | 1103     | 36.6      |
| 5038     | 4   | TET2   | c.4609C>T                                                                     | p.Arg1537*         | 1677     | 8.4       |
| 5132     | 18  | SETBP1 | c.244G>T                                                                      | p.Ala82Ser         | 2192     | 46.2      |
| 5132     | 18  | SETBP1 | c.2608G>C                                                                     | p.Gly870Arg        | 1780     | 38.4      |
| 5132     | 4   | TET2   | c.1397delT                                                                    | p.Leu467fs         | 1555     | 37.2      |
| 5804     | 17  | TP53   | c.817C>A                                                                      | p.Arg273Ser        | 1291     | 10.8      |
| 7395     | 2   | DNMT3A | c.2077C>T                                                                     | p.R693C            | 1527     | 22.5      |
| 7395     | 12  | PTPN11 | c.925A>G                                                                      | p.Ile309Val        | 1393     | 46.4      |
| 7395     | 21  | RUNX1  | c.552_553insT                                                                 | p.Asp185fs         | 1388     | 12.1      |
| 7395     | 21  | U2AF1  | c.470A>G                                                                      | p.Gln157Arg        | 1695     | 11.4      |
| 3766     | 12  | PTPN11 | c.215C>T                                                                      | p.Ala72Val         | 1545     | 11.7      |
| 3766     | 21  | RUNX1  | c.521G>A                                                                      | p.Arg174Gln        | 2244     | 41.7      |
| 4477     | 20  | ASXL1  | c.1928_1929insC                                                               | p.Gly646fs         | 1657     | 39.7      |
| 5971     | 17  | TP53   | c.796G>C                                                                      | p.Gly266Arg        | 383      | 15.9      |
| 5971     | 17  | TP53   | c.994-1G>GA                                                                   | Splice             | 2220     | 16.1      |
| 5971     | 21  | U2AF1  | c.101C>T                                                                      | p.Ser34Phe         | 844      | 5.9       |
| 6027     | 20  | ASXL1  | c.1762C>T                                                                     | p.Gln588*          | 938      | 9.7       |
| 6027     | 7   | EZH2   | c.2084C>T                                                                     | p.S695L            | 821      | 10.5      |
| 7205     | 21  | RUNX1  | c.351+1G>GA                                                                   | Splice             | 2042     | 14.3      |
| 0303     | 11  | ATM    | c.5821G>C                                                                     | p.Val1941Leu       | 965      | 44.6      |
| 6391     | X   | STAG2  | c.1535-2_1535-1insA                                                           | Splice             | 1093     | 18.6      |
| 6678     | 21  | RUNX1  | c.254T>C                                                                      | p.Leu85Pro         | 1431     | 18.6      |
| 7837     | 21  | RUNX1  | c.520C>T                                                                      | p.Arg174*          | 1631     | 30.9      |
| 7837     | 17  | TP53   | c.743G>A                                                                      | p.Arg248Gln        | 1081     | 47.5      |
| 0389     | 7   | EZH2   | c.475G>A                                                                      | p.Gly159Arg        | 475      | 48.4      |
| 4035     | 12  | KMT2D  | c.15621delC                                                                   | p.Val5208fs        | 1688     | 5.6       |
| 6622     | 17  | TP53   | c.517G>A                                                                      | p.Val173Met        | 1963     | 32.5      |
| 8256     | 4   | TET2   | c.1124C>G                                                                     | p.Ser375*          | 2945     | 5.9       |
| 8256     | 17  | TP53   | c.920-2A>GA                                                                   | Splice             | 4037     | 10.0      |
|          |     |        | c.1968_1998delCCAG<br>CATTTTCCTGTCTTCAT                                       |                    |          |           |
| 1482     | 2   | DNMT3A | GAATGAGAAA                                                                    | p.D656fs*26        | 1656     | 8.2       |
|          |     |        | c.965_1009+15delTCT<br>CCCCGCCTGAAGAGCA<br>CGCCATGCCATTGGG<br>AGAATAGCAGGTGAG |                    |          |           |
| 1482     | 12  | ETV6   | TGAGTTCCCC                                                                    | p.Val322_Ala336del | 1375     | 7.1       |
| 6160     | 17  | TP53   | c.713G>A                                                                      | p.Cys238Tyr        | 2320     | 16.7      |

| SampleID | Chr | Gene       | Coding change                        | Amino acid change   | Coverage | Frequency |
|----------|-----|------------|--------------------------------------|---------------------|----------|-----------|
| 6160     | 17  | TP53       | c.673-<br>7_674delCTCCTAGGT          | p.Val225fs          | 1856     | 15.5      |
| 6160     | 17  | TP53       | c.673-2_674delAGGT                   | Splice              | 2369     | 15.2      |
| 7212     | 17  | TP53       | c.80delC                             | p.Pro27fs           | 1090     | 16.5      |
| 7212     | 17  | TP53       | c.614A>C                             | p.Tyr205Ser         | 2388     | 19.5      |
| 7551     | 11  | CBL        | c.1027C>T                            | p.Arg343*           | 1698     | 12.0      |
| 7551     | 2   | SF3B1      | c.1997A>C                            | p.Lys666Thr         | 2055     | 29.9      |
| 7551     | 17  | SRSF2, MF5 | c.284C>A                             | p.P95H              | 1645     | 19.5      |
| 7677     | 21  | RUNX1      | c.413G>T                             | p.Gly138Val         | 1628     | 7.3       |
|          |     |            | c.9_32dupGGCGGCGG<br>GGAGCAGCATGGAGC |                     |          |           |
| 7763     | 9   | CDKN2A     | C                                    | p.A4_P11dup         | 786      | 6.2       |
| 7763     | 12  | PTPN11     | c.1658C>T                            | p.Thr553Met         | 1027     | 44.9      |
| 0140     | 17  | TP53       | c.524G>A                             | p.Arg175His         | 1985     | 12.9      |
| 0140     | 17  | TP53       | c.856G>A                             | p.Glu286Lys         | 1636     | 12.8      |
| 1077     | 2   | DNMT3A     | c.2077C>T                            | p.R693C             | 1818     | 46.7      |
| 1077     | 17  | SRSF2, MF5 | c.284C>A                             | p.P95H              | 1139     | 27.2      |
| 1372     | 17  | TP53       | c.747G>C                             | p.Arg249Ser         | 2635     | 35.6      |
| 1372     | 17  | TP53       | c.394A>G                             | p.Lys132Glu         | 1989     | 37.4      |
| 4772     | 17  | TP53       | c.818G>A                             | p.Arg273His         | 733      | 67.8      |
| 6645     | 17  | TP53       | c.711G>A                             | p.Met237Ile         | 1388     | 51.2      |
|          |     |            | c.329_338delGTCTGG                   | p.Arg110_Phe113deli |          |           |
| 6798     | 17  | TP53       | GCTTinsA                             | nsHis               | 360      | 61.4      |
| 1231     | X   | PHF6       | c.287delT                            | p.Val96fs           | 904      | 41.8      |
| 1757     | 21  | RUNX1      | c.211delC                            | p.Leu71fs           | 1597     | 8.5       |
| 1757     | 17  | TP53       | c.733G>A                             | p.Gly245Ser         | 2420     | 54.3      |
|          |     |            | c.1951_1958delGGCG                   |                     |          |           |
| 5226     | 20  | ASXL1      | GCGG                                 | p.Gly652fs          | 1384     | 48.0      |
| 5226     | 21  | U2AF1      | c.470A>C                             | p.Gln157Pro         | 1925     | 39.6      |
|          |     |            | c.1122_1131delCAGC                   |                     |          |           |
| 5226     | X   | ZRSR2      | AGGCTG                               | p.Ser375fs          | 949      | 70.7      |
| 5226     | X   | ZRSR2      | c.558-1G>CG                          | Splice              | 886      | 9.8       |
| 2239     | 4   | TET2       | c.3979delC                           | p.Gln1327fs         | 700      | 7.0       |
| 2239     | 21  | U2AF1      | c.101C>T                             | p.Ser34Phe          | 829      | 8.3       |
|          |     |            | c.2455_2456insGAGA                   |                     |          |           |
| 4802     | 20  | ASXL1      | T                                    | p.Asp821fs          | 2366     | 28.1      |
| 4802     | 9   | JAK2       | c.1849G>T                            | p.Val617Phe         | 1252     | 58.3      |
| 4802     | 17  | TP53       | c.714_715insGT                       | p.Asn239fs          | 2066     | 27.9      |
| 406      | 17  | TP53       | c.824G>A                             | p.Cys275Tyr         | 1004     | 6.2       |
| 0844     | 11  | CBL        | c.1250C>G                            | p.Pro417Arg         | 2644     | 29.7      |
| 0844     | 18  | SETBP1     | c.2607C>A                            | p.Ser869Arg         | 3011     | 15.3      |
| 3167     | X   | STAG2      | c.3092_3093insA                      | p.Leu1032fs         | 873      | 5.7       |

| SampleID | Chr | Gene   | Coding change    | Amino acid change | Coverage | Frequency |
|----------|-----|--------|------------------|-------------------|----------|-----------|
| 3167     | 17  | TP53   | c.551_554delATAG | p.Asp184fs        | 5596     | 25.2      |
| 5527     | 20  | ASXL1  | c.1926_1927insG  | p.Gly646fs        | 1483     | 34.2      |
| 5527     | 12  | ETV6   | c.313C>G         | p.Arg105Gly       | 1450     | 37.8      |
| 5527     | 3   | GATA2  | c.1187G>A        | p.Arg396Gln       | 2136     | 42.1      |
| 5527     | 1   | NRAS   | c.34G>A          | p.Gly12Ser        | 1604     | 44.1      |
| 5527     | 18  | SETBP1 | c.2608G>A        | p.Gly870Ser       | 1517     | 42.4      |
| 5527     | 21  | U2AF1  | c.470A>C         | p.Gln157Pro       | 2438     | 42.4      |
| 1607     | 11  | KMT2A  | c.82delG         | p.Gly29fs         | 24       | 8.3       |
| T513     | 17  | TP53   | c.817C>T         | p.Arg273Cys       | 1406     | 53.2      |
| 9107     | 2   | DNMT3A | c.1815C>A        | p.F605L           | 1370     | 12.8      |
| 9765     | 17  | TP53   | c.747G>C         | p.Arg249Ser       | 3313     | 27.9      |
| 9765     | 17  | TP53   | c.782+1G>GA      | Splice            | 5764     | 32.0      |

**Supplement table 3- Microarray results**

|    | <b>Cytogenetics/FISH</b>                                                                     | <b>Cytogenomic Microarray (CMA)<sup>1&amp;2</sup></b>                                                                                                                                                                                                                                                                                                                                                                                                                                  | <b>Description of CMA added value</b>                                                                                                                                                            |
|----|----------------------------------------------------------------------------------------------|----------------------------------------------------------------------------------------------------------------------------------------------------------------------------------------------------------------------------------------------------------------------------------------------------------------------------------------------------------------------------------------------------------------------------------------------------------------------------------------|--------------------------------------------------------------------------------------------------------------------------------------------------------------------------------------------------|
| 1  | Stemline: 43,X,-Y,-5,-7,dic(12;18)(p12.2;p11.2),+r1 [15 /20 ]Sideline: 44,idem,+r2 [5 /20 ]  | - 5p15.33p13.3(113,576-31,155,754)x1-2<br>- 5q23.1q35.3(118,618,699-180,719,789)x1-2<br>- 7p22.3q36.3(43,360-159,119,707)x1<br>- 12p13.33(173,786-2,612,192)x1-2<br>- 12p13.32(3,436,758-4,990,196)x3<br>- 12p13.32p13.31(4,990,825-5,925,341)x2-3<br>- 12p13.31p12.1( 5,936,101-23,910,093)x1-2<br>- 17p13.3p11.1(18,900-22,217,883) hmz <sup>3</sup><br>- 18p11.32(136,226-1,374,335)x1-2<br>- 18p11.32p11.21(1,373,923-14,734,334)x1-2<br>- Yp11.31q11.23(2,650,140-28,799,937)x0-1 | 5p and 5q loss rather than -5. 12p and 18p have complex losses/gains. 17p LOH involving <i>TP53</i> .                                                                                            |
| 2  | Stemline: 47,XX,del(1)(p34.3p36.1),del(5)(q13q35),+8,t(15;21)(q15;q22.3) [20 /20]            | - 1p36.32p35.2(2,458,619-30,351,602)x1-2<br>- 5q14.2q34(82,375,769-165,838,507)x1-2<br>- 8p23.3q24.3(158,048-146,295,771)x2-3                                                                                                                                                                                                                                                                                                                                                          | None                                                                                                                                                                                             |
| 3  | Stemline: 46,XY,t(3;12)(p25;q13) [16/20]                                                     | Normal study                                                                                                                                                                                                                                                                                                                                                                                                                                                                           | None                                                                                                                                                                                             |
| 4  | Stemline: 45,XY,t(2;19)(p13;q13.1),t(3;8)(p25;q13),-7,?del(17)(q21q22),add(20)(p13) [24/27 ] | - 2p16.1p14(55,640,032-65,276,312) hmz<br>- 7p22.1p11.2(7,198,130-56,223,838)x1-2<br>- 7q22.1q36.3(99,171,842-159,119,707)x1-2<br>- 8p22p21.2(13,707,775-23,551,121) hmz<br>- 11q25(134,355,932-134,764,922)x3-4<br>- 12q21.31q21.32(85,924,926-87,979,453)x1-2                                                                                                                                                                                                                        | LOH on 2p and 8p, small gain on 11q and loss on 12q. Large 7p and 7q losses rather than -7.                                                                                                      |
| 5  | Stemline: 47,XX,+21[15/20]. 8.3% trisomy 21 by FISH.                                         | Trisomy 21                                                                                                                                                                                                                                                                                                                                                                                                                                                                             | None                                                                                                                                                                                             |
| 6  | Previous Stemline: 45,XX,del(5)(q15),-6,der(7)t(?2;7)(q21;p15),-18,+mar[1/20]                | - 2q21.2(132,721,612-133,358,558)x3<br>- 4q13.2q13.3(68,739,143-72,269,733) hmz                                                                                                                                                                                                                                                                                                                                                                                                        | 3.5 Mb LOH on 4q involving 49 genes, small gain on 2q.                                                                                                                                           |
| 7  | Stemline: 45,XY,-7,del(12)(p11.2p13)[2] Constitutional Cell Line: 46,XY[2/20]                | - 6p11.2(57,215,493-57,641,858)x3<br>- 7p22.3q36.1(2,761,829-152,239,258)x1-2<br>- 12p13.31p11.21(9,293,420-31,869,307)x1-2                                                                                                                                                                                                                                                                                                                                                            | Small 6p gain involving only 1 gene ( <i>PRIM2</i> ).                                                                                                                                            |
| 8  | Stemline: 45,XY,-5,add(17)(p11.2),-18,+mar[6/20]                                             | - 5p12q12.3(43,301,512-65,550,256)x1-2<br>- 5q14.1q35.3(79,393,143-180,719,789)x1-2<br>- 6q14.1(78,336,648-78,749,628)x3<br>- 10q11.21q11.22(44,815,708-48,364,115) hmz<br>- 17p11.2(17,352,340-20,640,934) hmz<br>- 17p13.3p12(525-14,003,182)x1-2<br>- 18p11.32p11.31(136,226-7,089,771)x1-2<br>- 18q11.2q23(23,627,402-78,014,123)x1-2                                                                                                                                              | Confirmed <i>TP53</i> deletion. Array data indicates marker is likely der(18). 5p and 5q have large losses rather than monosomy 5. 10q LOH containing 75 genes and 17p LOH containing 117 genes. |
| 9  | 46,XX                                                                                        | - 5q35.2q35.3(173,749,574-177,902,889) hmz                                                                                                                                                                                                                                                                                                                                                                                                                                             | 4 Mb LOH on 5q containing 61 genes including <i>NSD1</i> (mutated in Sotos and Weaver syndrome), <i>DDX41</i> and <i>NHP1</i> .                                                                  |
| 10 | Stemline: 46,XX,t(1;17)(p36.3;q23)[2/20]                                                     | Normal study                                                                                                                                                                                                                                                                                                                                                                                                                                                                           | None                                                                                                                                                                                             |
| 11 | Stemline: 45,XY,-7[13/20] FISH positive for monosomy 7 at 34%                                | - 7p22.3q36.3(43,360-159,119,707)x1-2                                                                                                                                                                                                                                                                                                                                                                                                                                                  | None                                                                                                                                                                                             |
| 12 | 46,XX,inv(11)(p15q22)[21]                                                                    | Normal study                                                                                                                                                                                                                                                                                                                                                                                                                                                                           | None                                                                                                                                                                                             |

|    |                                                                                                                                                                      |                                                                                                                                                                                                                                                                                                                                                                                                    |                                                                                                                                                                      |
|----|----------------------------------------------------------------------------------------------------------------------------------------------------------------------|----------------------------------------------------------------------------------------------------------------------------------------------------------------------------------------------------------------------------------------------------------------------------------------------------------------------------------------------------------------------------------------------------|----------------------------------------------------------------------------------------------------------------------------------------------------------------------|
| 13 | Stemline: 45,XX,-7,i(22)(q10)[14/20]<br>Sideline: 45,X,del(X)(q24q28),-7[8/20]                                                                                       | - 7p22.3q36.3(43,360-159,119,707)x1-2<br>- <b>17q11.2(26,254,603-31,087,928)x1-2</b><br>- <b>19p13.3p13.11(260,911-17,387,176) h mz</b><br>- 22q11.1q13.33(16,888,899-51,197,838)x2-3<br>- Xp22.33p11.1(168,546-58,368,204)x3                                                                                                                                                                      | 17q loss involving 102 genes namely <i>NF1</i> . Large LOH on 19p involving 529 genes.                                                                               |
| 14 | 46,XX [20]                                                                                                                                                           | - <b>9q34.11(132,449,936-132,795,093)x3</b><br>- <b>17q25.3(78,366,131-78,398,120)x1</b>                                                                                                                                                                                                                                                                                                           | Small gains on 9p and 17q with unknown significance.                                                                                                                 |
| 15 | Stemline: 46,XX,del(7)(q22),add(18)(p11.2),inv(18)(q21.1q23)[20]                                                                                                     | - <b>1p12p11.2(120,549,228-120,606,931)x1-2</b><br>- <b>3q26.2q29(170,650,651-197,851,986)x2-3</b><br>- 7q21.12q36.3(88,109,148-159,119,707)x1-2<br>- <b>15q11.2(22,770,421-23,291,159)x2-3</b><br>- 18p11.32p11.21(136,226-12,039,463)x1-2<br>- <b>18q12.1(28,769,131-31,940,611) h mz</b><br>- <b>18q21.2q23(49,708,959-78,014,123)x1-2</b><br>- <b>21q22.13q22.3(38,189,113-48,097,372)x3-4</b> | Several large gains and losses on 3q, 18q and 21q as well as an LOH on 18q. Loss of exon 2 of <i>NOTCH2</i> on 1p.                                                   |
| 16 | 46,XX                                                                                                                                                                | - <b>1p12p11.2(120,549,754-120,611,245)x1-2</b>                                                                                                                                                                                                                                                                                                                                                    | Loss of exon 2 of <i>NOTCH2</i> on 1p.                                                                                                                               |
| 17 | 46,XX,?Add(15)(q24)[2/20]                                                                                                                                            | - <b>3p22.2p21.31(36,597,900-46,366,324) h mz</b>                                                                                                                                                                                                                                                                                                                                                  | 9.7 Mb LOH on 3p involving 169 genes such as <i>MLH1</i> .                                                                                                           |
| 18 | FISH positive for del(5) (9.5%) and trisomy 8 (16%)                                                                                                                  | Normal study                                                                                                                                                                                                                                                                                                                                                                                       | None                                                                                                                                                                 |
| 19 | Stemline: 46,XY,t(1;16)(q21;p13.3),der(2)?T(2;11)(p23;q23)del(2)(q33q37),add(4)(p14),add(5)(q11.2),add(6)(p23),del(10)(q22q24),der(11)t(2;11),?Del(13)(q12q22)[2/30] | - <b>13q12.12q12.2(24,721,630-28,881,335) h mz</b><br>- <b>13q12.3q13.2(30,750,386-35,155,254) h mz</b>                                                                                                                                                                                                                                                                                            | Two adjacent LOH regions involving several genes such as <i>PAN3</i> , <i>FLT3</i> , <i>CDX2</i> , <i>BRCA2</i> , <i>HSPH1</i> , <i>PDS5B</i> , and <i>STARD13</i> . |
| 20 | 46,XX [19/20]                                                                                                                                                        | - <b>7p22.3q36.3(43,360-159,119,707)x1-2</b><br>- <b>Xq26.2q26.3(130,793,578-133,944,050) h mz</b>                                                                                                                                                                                                                                                                                                 | Monosomy 7. LOH on Xq involving <i>GPC3</i> and <i>PHF6</i> .                                                                                                        |
| 21 | Stemline: 46,XX,del(2)(q3?2q35),del(7)(q21.2q22.3),r(11)(p13q23)[2/20]<br>Sideline: 46,sl,t(X;16)(p11.2;q22),del(13)(q12q22)[11/20]                                  | - <b>2q32.1q37.3(188,400,999-242,783,384)x1-2</b><br>- 7q22.1q22.3(98,648,364-106,197,812)x1-2<br>- <b>11p15.1p12(19,640,816-39,620,383)x1-2</b><br>- <b>11p12q14.1(39,795,927-82,850,496)x2-3</b><br>- <b>11q14.1q25(83,231,956-134,938,470)x1-2</b><br>- 13q13.1q21.33(32,627,618-69,403,994)x1-2                                                                                                | Large losses on 11p and 11q as well as trisomy of the resultant der(11).                                                                                             |
| 22 | 46,XY                                                                                                                                                                | Normal study                                                                                                                                                                                                                                                                                                                                                                                       | None                                                                                                                                                                 |
| 23 | 46,XY,r(7)(p15q22)[20].<br>FISH positive for del(7) (67.5%)                                                                                                          | - <b>4q32.1(156,453,560-161,751,904) h mz</b><br>- <b>7p22.3p11.2(43,360-56,679,833)x1-2</b><br>- <b>7q21.13q36.3(90,333,513-159,119,707)x1-2</b><br>- <b>20q11.21q11.22(29,448,795-32,629,322) h mz</b>                                                                                                                                                                                           | LOH on 4q and 20q including <i>ASXL1</i> .                                                                                                                           |
| 24 | Stemline: 47,XX,+15[12/20]                                                                                                                                           | - <b>2q22.1q22.3(139,802,110-148,374,082) h mz</b><br>- <b>3q12.3q13.11(102,246,060-105,914,183) h mz</b><br>- <b>4q32.1q32.2(157,612,290-162,375,382) h mz</b><br>- <b>5q14.3(83,003,741-88,002,445) h mz</b><br>- <b>17p11.2p11.1(18,860,660-22,217,883) h mz</b><br>- <b>17q11.1q11.2(25,309,336-28,687,196) h mz</b>                                                                           | Several LOH blocks on chromosomes 2q, 3q, 4q, 5q, 17p and 17q.                                                                                                       |
| 25 | del20q per outside report                                                                                                                                            | - <b>7q34q36.3(142,918,614-159,119,707)x1-2</b><br>- <b>8p23.3p23.2(158,048-3,258,947)x2-3</b><br>- <b>10q26.2q26.3(128,877,541-135,427,143)x2-3</b><br>- <b>16q11.2q24.3(46,463,672-90,155,062)x1-2</b><br>- <b>17p13.3p11.1(1,397,388-22,261,792)x1-2</b><br>- 20q11.23q13.31(36,339,323-56,296,530)x1-2                                                                                         | Large gains 8p and 10q. Large losses on 7q, 16q and 17p. The latter loss involves <i>TP53</i> .                                                                      |



|    |                                                                                                                                       |                                                                                                                                                                                                                                                                                                                                                                                                                                                                                                                                                                                                                                                                                |                                                                                                       |
|----|---------------------------------------------------------------------------------------------------------------------------------------|--------------------------------------------------------------------------------------------------------------------------------------------------------------------------------------------------------------------------------------------------------------------------------------------------------------------------------------------------------------------------------------------------------------------------------------------------------------------------------------------------------------------------------------------------------------------------------------------------------------------------------------------------------------------------------|-------------------------------------------------------------------------------------------------------|
| 26 | del5,mono12,add 12p per outside report                                                                                                | <ul style="list-style-type: none"> <li>- <b>5q11.2q33.2(52,418,898-154,787,663)x1-2</b></li> <li>- <b>12q14.3(65,178,751-66,533,363)x3</b></li> <li>- <b>12q14.3q15(67,635,402-71,180,545)x2-3</b></li> <li>- <b>12q21.1(72,203,588-72,915,302)x3</b></li> <li>- <b>12q21.1(72,915,349-75,033,481)x2-3</b></li> <li>- <b>12q21.1q21.2(75,051,120-76,379,095)x2-3</b></li> <li>- <b>12q21.2q24.32(76,387,175-128,682,425)x1-2</b></li> <li>- <b>12q24.32q24.33(128,685,658-132,696,025)x2-3</b></li> <li>- <b>12q24.33(132,811,668-133,777,902)x1-2</b></li> <li>- <b>17p13.3p13.1(272,528-7,512,922)x1-2</b></li> <li>- <b>17p13.1q12(8,827,926-34,477,480)x1-2</b></li> </ul> | Very complex rearrangement of 12q containing several tandem gains flanking a large loss. Loss on 17p. |
| 27 | 46,XY                                                                                                                                 | <ul style="list-style-type: none"> <li>- <b>1q21.3q23.2(154,945,046-159,833,733) hmz</b></li> <li>- <b>6p12.1p11.1(55,395,819-58,741,497) hmz</b></li> <li>- <b>6q11.1q12(61,968,745-67,820,187) hmz</b></li> <li>- <b>6q14.1q14.3(82,721,983-86,094,187) hmz</b></li> <li>- <b>8p12p11.23(31,123,340-37,085,115) hmz</b></li> <li>- <b>13q14.13(46,713,528-46,738,835)x1</b></li> </ul>                                                                                                                                                                                                                                                                                       | Several LOH regions on chromosomes 1q, 6p, 6q and 8p. A small loss on 13q involving <i>LCP1</i> .     |
| 28 | 46,XX                                                                                                                                 | - <b>15q11.2(22,770,421-23,288,350)x3</b>                                                                                                                                                                                                                                                                                                                                                                                                                                                                                                                                                                                                                                      | Likely constitutional gain on 15q involving 16 genes.                                                 |
| 29 | 47,XY,+8[20]                                                                                                                          | - 8p23.3q24.3(158,048-146,295,771)x3                                                                                                                                                                                                                                                                                                                                                                                                                                                                                                                                                                                                                                           | None                                                                                                  |
| 30 | Stemline: 48,XY,del(1)(p32p36.1),+8,+14[2/20] Sideline 1: 47,sl,r(5)(q11.2p15.3),-7[8/20] Sideline 2: 47,sdl1,del(12)(p11.2p13)[2/20] | <ul style="list-style-type: none"> <li>- 1p36.22p35.1(9,368,485-32,450,276)x1-2</li> <li>- <b>2q33.3q34(208,743,984-211,927,188) hmz</b></li> <li>- <b>3q22.2q23(135,607,906-138,854,718) hmz</b></li> <li>- 5q22.3q35.3(114,380,344-180,719,789)x1-2</li> <li>- 7p22.3q36.3(43,360-159,119,707)x1-2</li> </ul>                                                                                                                                                                                                                                                                                                                                                                | LOH on 2q including <i>MAP2</i> and <i>IDH1</i> . LOH on 3q included <i>FOXL1</i> and <i>FAIM</i> .   |
| 31 | 43-46,XX,-5,-7,add(7)(q11),-17,add(17)(p11)[7/20]                                                                                     | Normal study                                                                                                                                                                                                                                                                                                                                                                                                                                                                                                                                                                                                                                                                   | None                                                                                                  |
| 32 | 45,XY,-7[17/20]                                                                                                                       | <ul style="list-style-type: none"> <li>- 7p22.3q36.3(43,360-159,119,707)x1-2</li> <li>- <b>11q12.3q25(63,180,135-134,942,626) mos hmz</b></li> </ul>                                                                                                                                                                                                                                                                                                                                                                                                                                                                                                                           | Mosaic CN-LOH on most of 11q including <i>CBL</i> .                                                   |
| 33 | Stemline: 45,XX,-18 [3/20] Sideline: 44,idem,der(2)t(2;6)(q21;q11),add(4)(q25),6,der(8)t(2;8)(q21;q24.?) [17/20]                      | <ul style="list-style-type: none"> <li>- 3p26.2p26.1(3,899,790-4,183,674)x1</li> <li>- <b>4q24q35.2(102,892,996-190,957,473)x1-2</b></li> <li>- <b>6p25.3p22.3(156,974-24,957,511)x1-2</b></li> <li>- 18p11.32q23(136,226-78,014,123)x1-2</li> </ul>                                                                                                                                                                                                                                                                                                                                                                                                                           | Large loss on 6p. Likely constitutional small loss on 3p.                                             |
| 34 | 47,XX,t(1;4)(p36;p12),der(6)t(6;15)(p23;q13),add(7)(q11.2),+11,-15,+22 per outside report.                                            | <ul style="list-style-type: none"> <li>- <b>7q21.3q36.1(93,084,664-151,033,762)x1-2</b></li> <li>- <b>9q21.33q22.33(90,124,740-101,371,666)x1-2</b></li> <li>- 11p15.5q25(230,615-134,938,470)x2-3</li> </ul>                                                                                                                                                                                                                                                                                                                                                                                                                                                                  | Large loss on 9q involving <i>SYK</i> and <i>FANCC</i> .                                              |

<sup>1</sup> Bold font indicates copy number variations (CNVs) detected only by CMA or those that clarified/modified the previously reported abnormalities on conventional cytogenetics or FISH.

<sup>2</sup> Regular font indicates CMA detected previously reported abnormalities.

<sup>3</sup> Hmz is referred to copy-neutral loss of heterozygosity (CN-LOH)

# Supplement figure 1- TP53 mutation plot

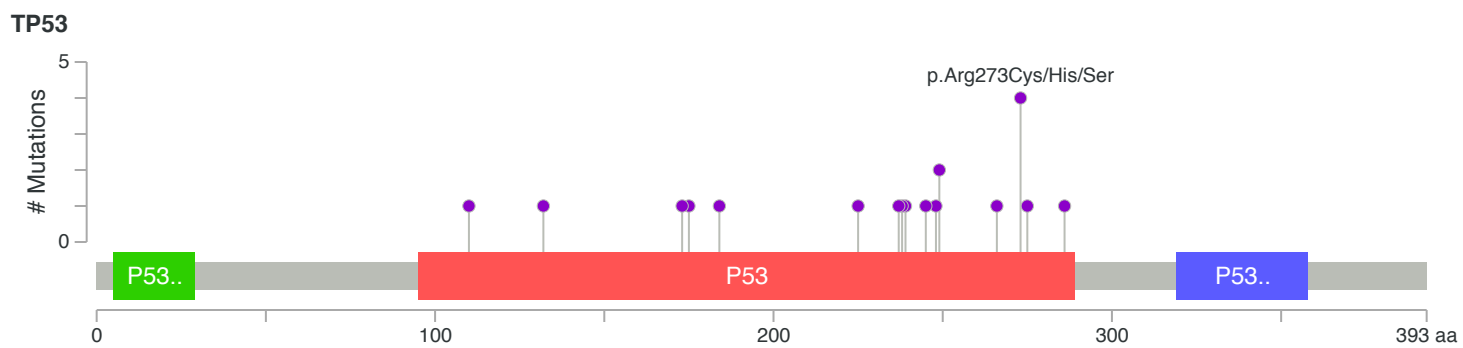

### Supplement figure 2a- OS by number of TP53 mutations

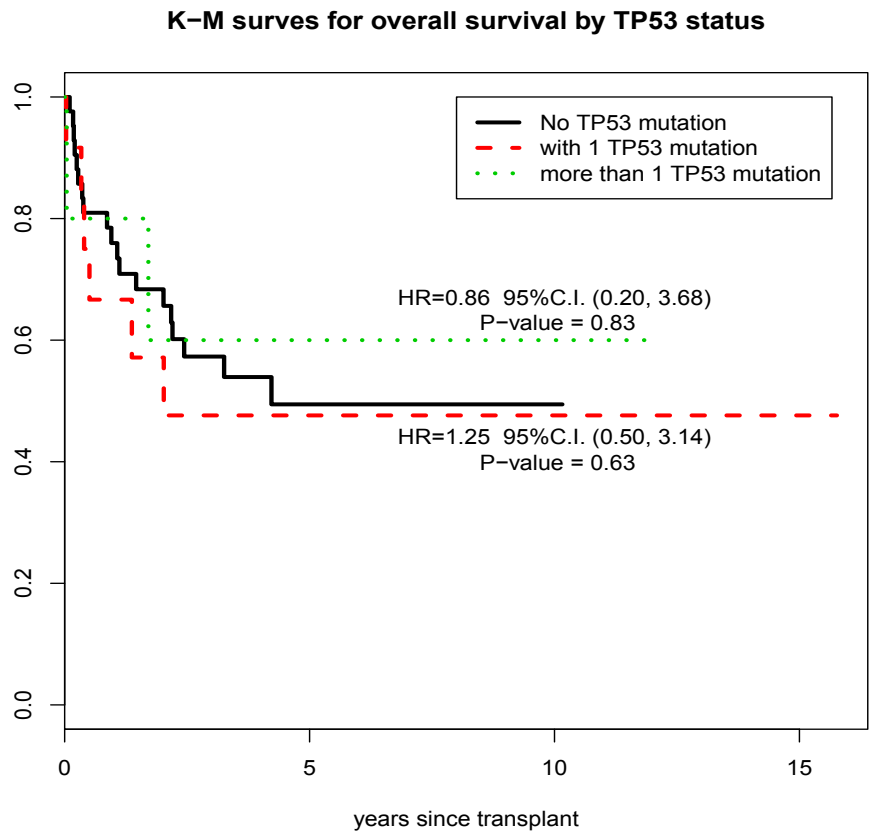

### Supplement figure 2b- RFS by number of TP53 mutations

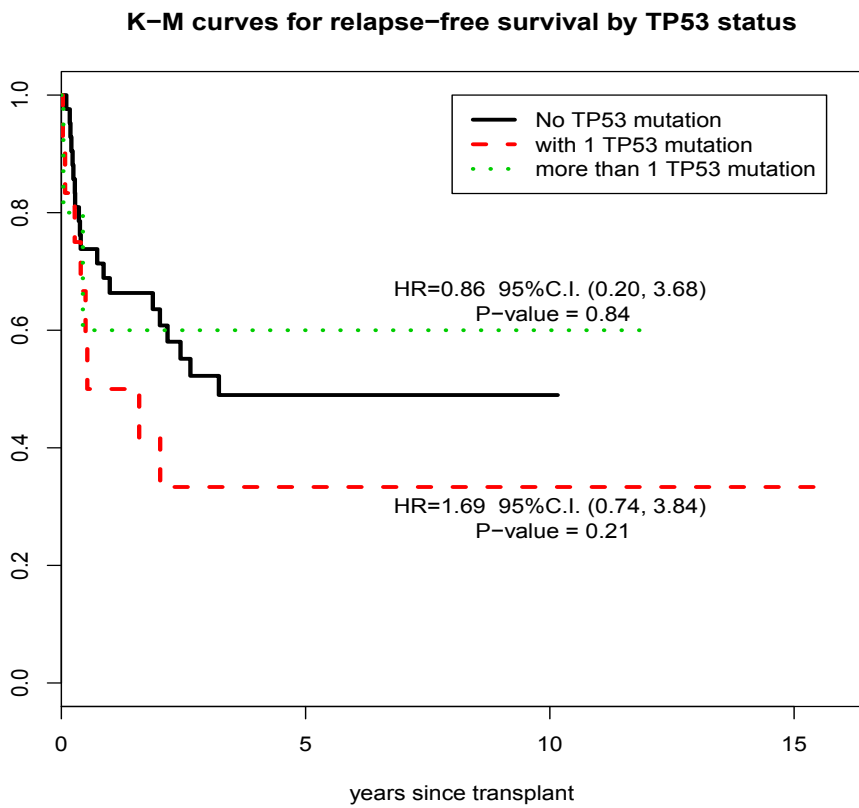

**Supplement figure 3-** t-MDS cases undergone CMA analysis (n=34)

■ CMA with added value (N=24)      ■ CMA without added value (N=10)

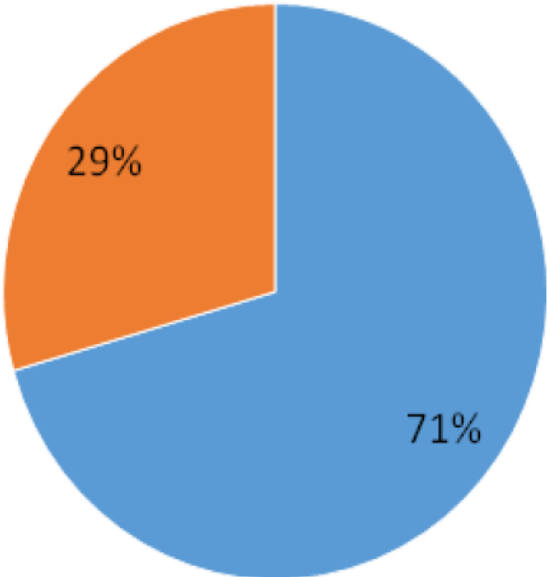

Supplement: 2017.172544.ALDOSS_SUPPL.pdf [file 2017.172544.ALDOSS_SUPPL.pdf]
