# Supplementary material for: Favorable impact of allogeneic stem cell transplantation in patients with therapy-related myelodysplasia regardless of TP53 mutational status
Source: PubMed Central journal article supplement — Haematologica. 2017 Sep 29;102(12):2030–8. doi: 10.3324/haematol.2017.172544 (PMC5709102; doi:10.3324/haematol.2017.172544), 2017-12
Supplement: 2017_172544-Disclosures_and_Contributions.pdf [file 2017_172544-Disclosures_and_Contributions.pdf]

Haematologica  
HAEMATOL/2017/172544  
Version 3

Favorable impact of allogeneic stem cell transplantation in patients with therapy-related myelodysplasia regardless of TP53 mutational status

Ibrahim Aldoss, Anh Pham, Sierra Min Li, Ketevan Gendzekhadze, Michelle Afkhami, Mihan Telatar, Hao Hong, Abbas Padeganeh, Victoria Bedell, Thai Cao, Samer K Khaled, Monzr M Al Malki, Amandeep Salhotra, Haris Ali, Ahmed Aribi, Joycelynne Palmer, Patricia Aoun, Ricardo Spielberger, Anthony S Stein, David Snyder, Margaret R O'Donnell, Joyce Murata-Collins, David Senitzer, Dennis Weisenburger, Stephen J Forman, Vinod Pullarkat, Guido Marcucci, Raju Pillai, and Ryotaro Nakamura

Disclosures: There is no Conflict of Interest to Disclose

Contributions: Ibrahim Aldoss, Ann Pham, Ketevan Gendzekhadze, Vinod Pullarkat, Guido Marcucci, Raju Pillai and Ryotaro Nakamura contributed to the study conception and designing. Ibrahim Aldoss, Ann Pham, Thai Cao, Samer Khaled, Monzr Al Malki, Amandeep Salhotra, Haris Ali and Ahmed Aribi contributed to data acquisition. Ibrahim Aldoss, Ann Pham, Vinod Pullarkat, Guido Marcucci, Raju Pillai, Ryotaro Nakamura, Sierra Min Li, Ketevan Gendzekhadze, Michelle Afkhami, Milhan Telatar, Hao Hong, Abbas Padeganeh, Victoria Bedell, Joycelynne Palmer, Patricia Aoun, Ricardo Spielberger, Anthony Stein, David Snyder, Margaret O'Donnell, Joyce Murrata-Collins, David Senitzer, Dennis Weisenburger, and Stephen Forman contributed to analyzing and interpreting the data. All authors participated in drafting the article and contributed to intellectual content, and approved the final version of the manuscript.
