# Supplementary material for: Favorable impact of allogeneic stem cell transplantation in patients with therapy-related myelodysplasia regardless of TP53 mutational status
Source: PubMed Central journal article supplement — Haematologica. 2017 Sep 29;102(12):2030–8. doi: 10.3324/haematol.2017.172544 (PMC5709102; doi:10.3324/haematol.2017.172544), 2017-12
Supplement: HAEMATOL-2017-172544v3-Aldoss-01.pdf [file HAEMATOL-2017-172544v3-Aldoss-01.pdf]

# Allogeneic transplantation is a curing treatment for patients with therapy related myelodysplastic syndrome despite higher-risk features

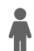

266 patients with diagnosis of MDS who received alloHCT

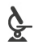

Analysis of clinical characteristics and outcomes

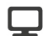

Next generation sequencing of 72 genes

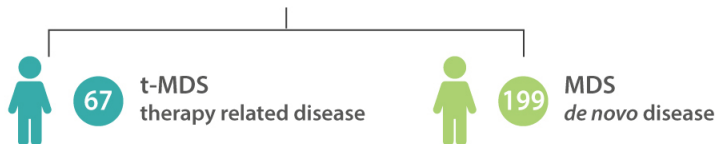

|                          |       |       |         |
|--------------------------|-------|-------|---------|
| 5-year overall survival  | 49.9% | 53.9% | p=0.61  |
| Intermediate-2/High IPSS | 59.7% | 43.7% | p=0.003 |
| High-risk karyotypes     | 61.2% | 30.7% | p<0.01  |

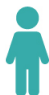

t-MDS

30%

mutations in TP53

48%

mutations in high-risk genes (EZH2, ETV6, RUNX1, ASXL1)

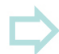

No impact

- overall survival
- relapse-free survival
